# Supplementary material
Source: MDPI journal article supplement (https://www.mdpi.com/1996-1073/13/13/3496)
Supplement: s1 [file s1]

Dear Srs,

We want to add another autor since he has involved in running the simulations for the reply to the reviewers.

The new author is Dinesh. V. Thangamuthu, and the order of the authors in the manuscript should be as follows:

**Carlos Candelo-Zuluaga**<sup>1</sup>, **Jordi-Roger Riba**<sup>1,\*</sup>, **Dinesh V. Thangamuthu**<sup>1</sup> and **Antoni Garcia**<sup>1</sup>

<sup>1</sup> Electrical Engineering Department; Universitat Politècnica de Catalunya, Terrassa, 08222, Spain; carlos.andres.candelo@upc.edu (C.C.); [dineshthangamuthu1600@gmail.com](mailto:dineshthangamuthu1600@gmail.com) (D.T.) [garciae@ee.upc.edu](mailto:garciae@ee.upc.edu) (A. G.);

\* Correspondence: [riba@ee.upc.edu](mailto:riba@ee.upc.edu); Tel.: +34-937398365

The authors agree with the authorship:



Carlos Candelo-Zuluaga

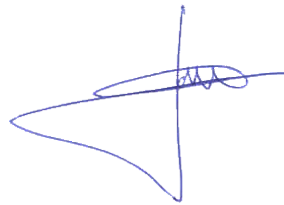

Jordi-Roger Riba

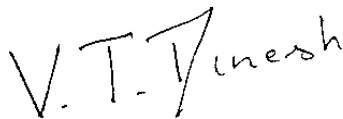

Dinesh. V. Thangamuthu



Antoni Garcia
